# Supplementary material for: The impact of the rotation rate on an aquaplanet's radiant energy budget: insights from experiments varying the Coriolis parameter
Source: Copernicus journal article supplement (doi:10.5194/wcd-6-489-2025), 2025-04-25
Supplement: Supplementary file 1 [file wcd-6-489-2025-supplement.pdf]

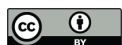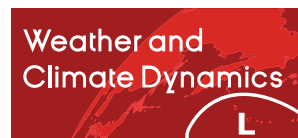

Open Access

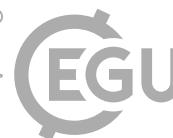

*Supplement of*

## **The impact of the rotation rate on an aquaplanet's radiant energy budget: insights from experiments varying the Coriolis parameter**

**Abisha Mary Gnanaraj et al.**

*Correspondence to:* Abisha Mary Gnanaraj ([abisha.gnanaraj@mpimet.mpg.de](mailto:abisha.gnanaraj@mpimet.mpg.de))

The copyright of individual parts of the supplement might differ from the article licence.

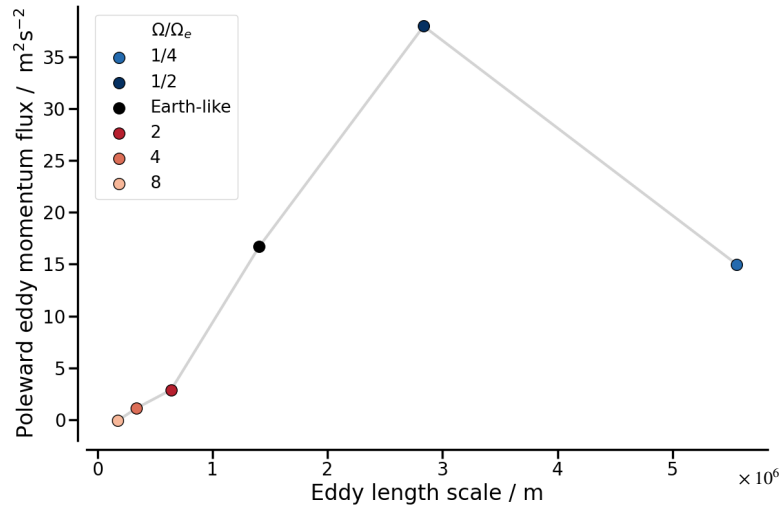

Figure S1: Eddy momentum flux vs eddy length scale for different rotation rates.

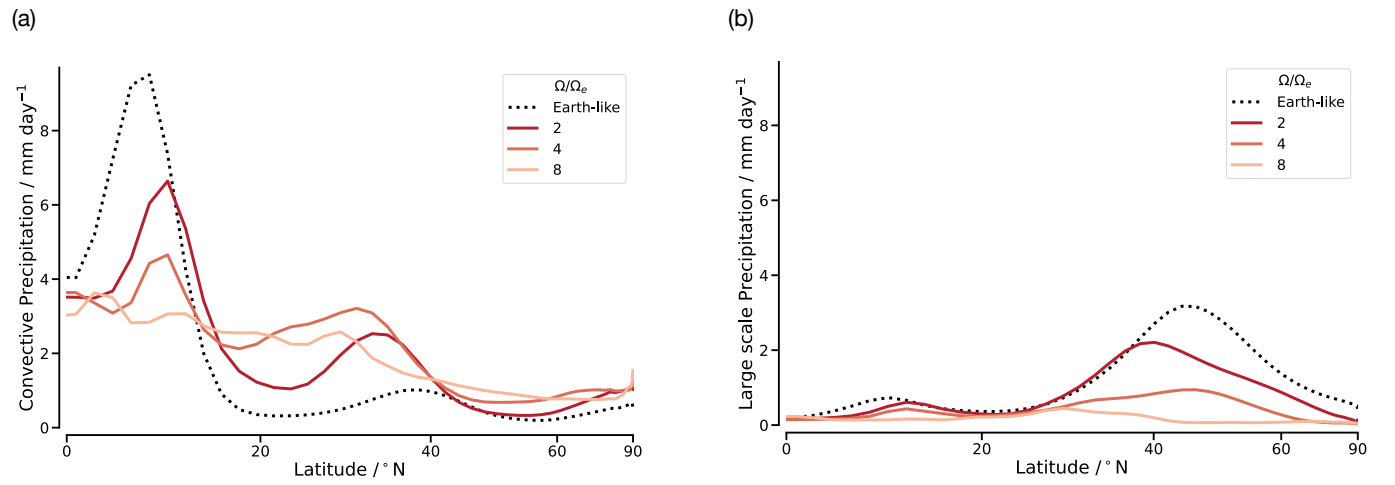

Figure S2: Zonal mean of (a) convective and (b) large-scale precipitation for rotation rates from Earth-like to  $\Omega/\Omega_e = 8$ .

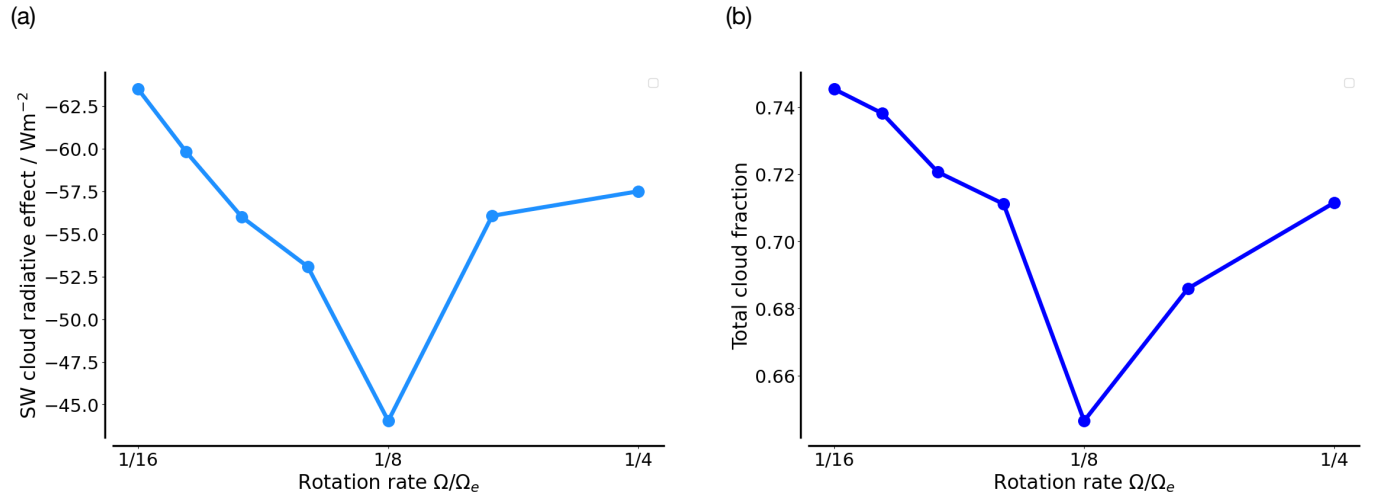

Figure S3: Global mean of (a) SW cloud radiative effect and (b) total cloud fraction for rotation rates between  $\Omega/\Omega_e = 1/4$  and  $\Omega/\Omega_e = 1/16$ .

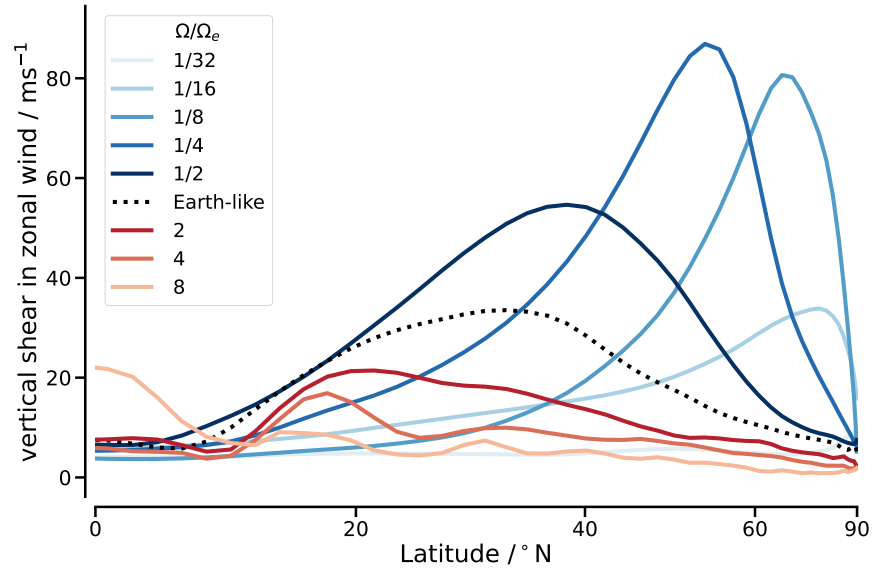

Figure S4: Zonal mean of the vertical shear of the zonal wind between 250 hPa and 850 hPa at different rotation rates.

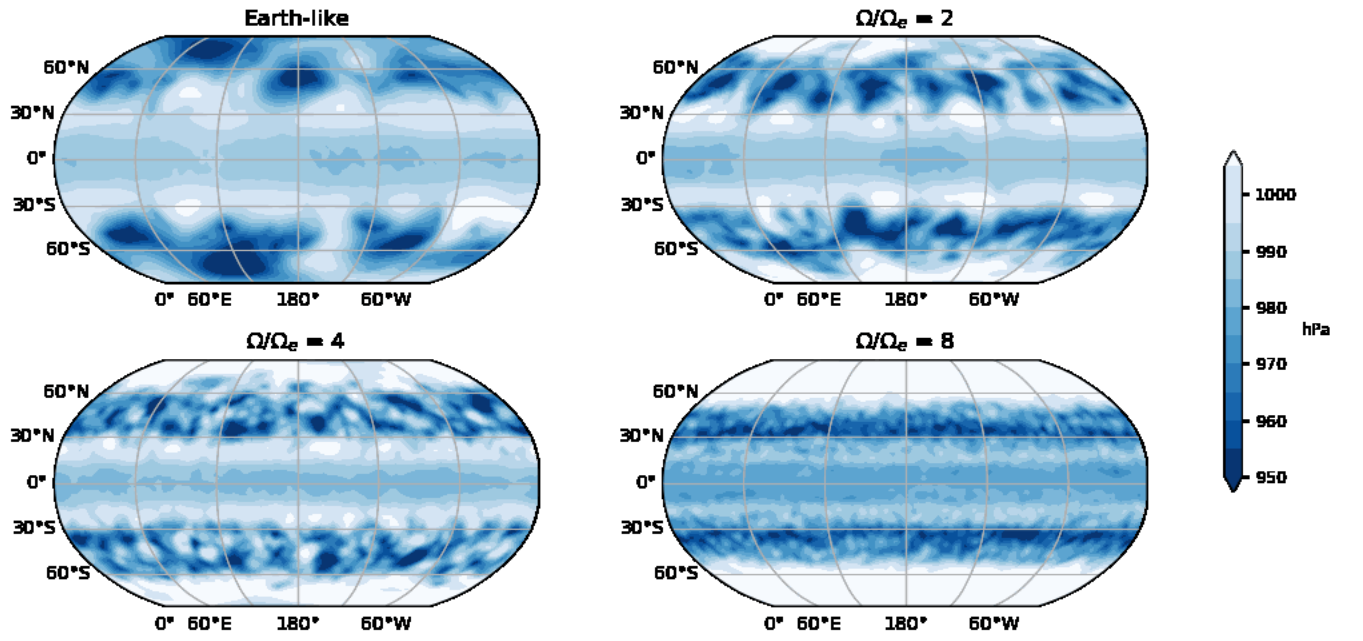

Figure S5: Snapshot of surface pressure for Earth-like and faster rotation cases.
